# Supplementary material
Source: Springer Nature journal article supplement (https://www.springermedizin.de/resource/supplementary/12902_2013_243_MOESM4_ESM.pdf/9515848)

|                   |        |
|-------------------|--------|
| Diabetes mellitus |        |
| Type 1            | Type 2 |

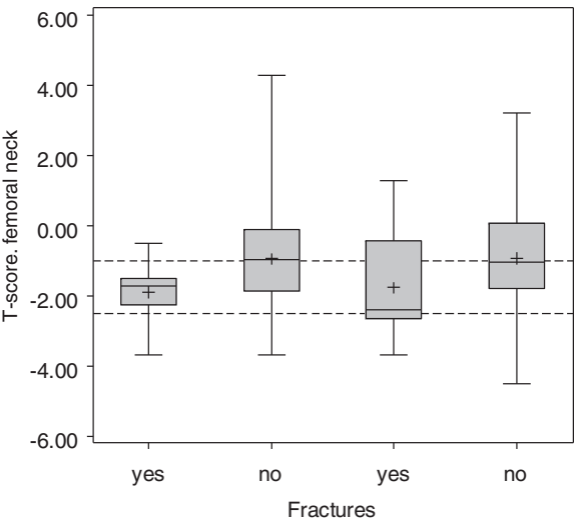

|                   |        |
|-------------------|--------|
| Diabetes mellitus |        |
| Type 1            | Type 2 |

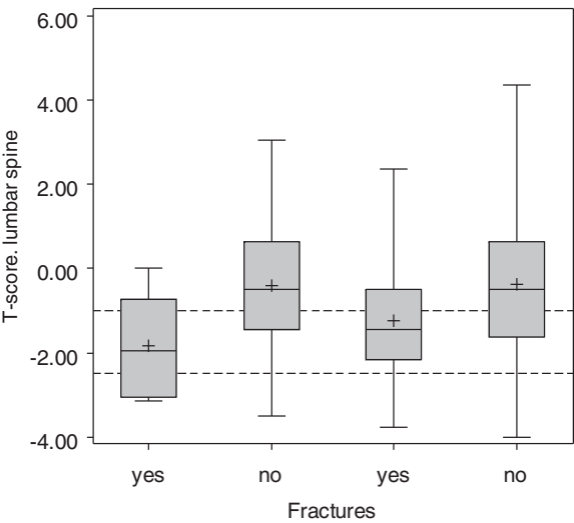

Supplement: MOESM4 [file 9515848]
